# Supplementary material for: Increased Therapeutic Efficacy of SLN Containing Etofenamate and Ibuprofen in Topical Treatment of Inflammation
Source: MDPI journal article supplement (doi:10.3390/pharmaceutics13030328), 2021-03-03
Supplement: s1 [file s1]

# Supplementary Materials: Increased Therapeutic Efficacy of SLN Containing Etofenamate and Ibuprofen in Topical Treatment of Inflammation

Giuliana Mancini, Lídia M.D. Gonçalves, Joana Marto, Filomena A. Carvalho, Sandra Simões \*, Helena Margarida Ribeiro \* and António J. Almeida\*

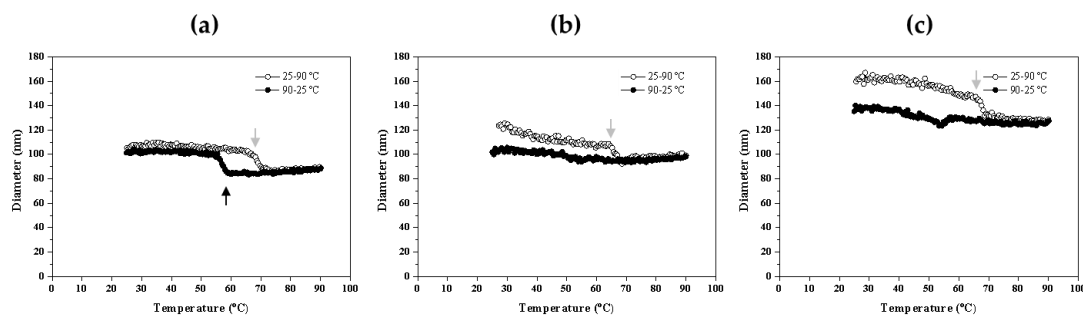

**Figure S1.** Influence of the temperature on the mean diameter and PDI of empty SLN (a), etofenamate-SLN (b) and ibuprofen-SLN (c), as determined by DLS analysis. (a) Empty particles reduce de size at 66 °C (grey arrow) and recover the initial size during the cooling phase at 55 °C (black arrow); (b) Etofenamate-SLN and (c) Ibuprofen-SLN reduced the size at 62 °C (grey arrows).

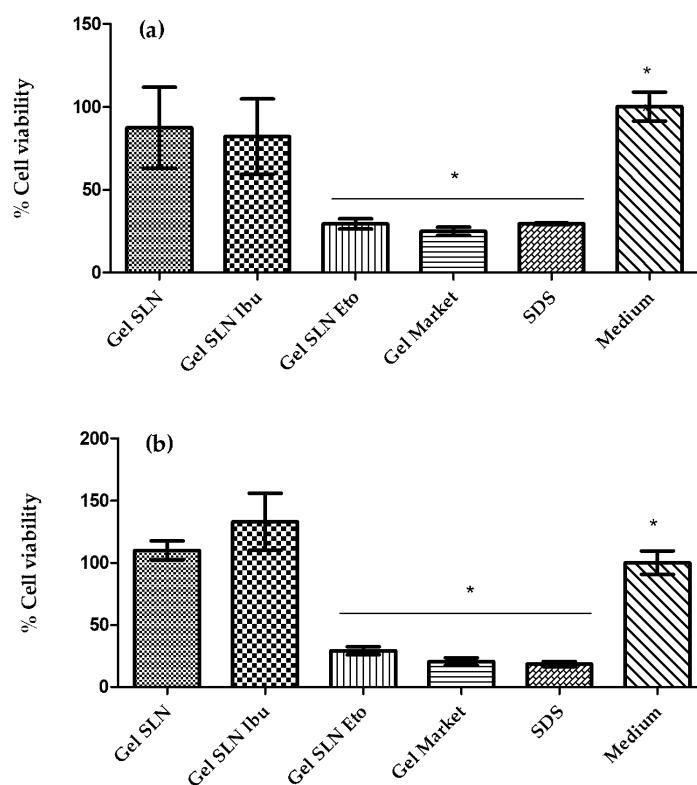

**Publisher's Note:** MDPI stays neutral with regard to jurisdictional claims in published maps and institutional affiliations.

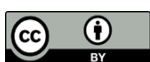

**Copyright:** © 2021 by the authors. Submitted for possible open access publication under the terms and conditions of the Creative Commons Attribution (CC BY) license (<http://creativecommons.org/licenses/by/4.0/>).

**Figure S2.** Cell viability ((a)- Df and (b)-HaCaT cell lines) after 24 h of incubation with 10  $\mu$ L of empty SLN hydrogel (Gel SLN), ibuprofen loaded-SLN hydrogel (Gel SLN Ibu) (3 mg/mL), etofenamate loaded-SLN hydrogel (Gel SLN Eto) (6 mg/mL), commercial etofenamate gel (Gel Market) (6 mg/mL), SDS (sodium lauryl sulfate) (10 mg/mL), and cell culture medium (Medium). Results represent the mean  $\pm$  S.D.,  $n = 9$ ; \*\*  $p < 0.05$  vs medium.
